# Supplementary material for: LRG1 Promotes ECM Integrity by Activating the TGF-β Signaling Pathway in Fibroblasts
Source: MDPI journal article supplement (doi:10.3390/ijms241512445), 2023-08-04
Supplement: s1 [file s1]

*Supplementary materials*

## **LRG1 promotes ECM integrity by activating the TGF- $\beta$ signaling pathway in fibroblasts**

**Han Na Park<sup>1</sup>, Min Ji Song<sup>2</sup>, Young Eun Choi<sup>1</sup>, Dong Hun Lee<sup>2,3,4</sup>, Jin Ho Chung<sup>2,3,4,5</sup>, and Seung-Taek Lee<sup>1,\*</sup>**

<sup>1</sup> Department of Biochemistry, College of Life Science and Biotechnology, Yonsei University, Seoul 03722, Republic of Korea; qkrgkssk1024@naver.com (H.N.P.); choii03271452@gmail.com (Y.E.C)

<sup>2</sup> Department of Dermatology, Seoul National University College of Medicine, Seoul 03080, Republic of Korea; minjisong@snu.ac.kr (M.J.S.); ivymed27@snu.ac.kr (D.H.L.); jhchung@snu.ac.kr (J.H.C.)

<sup>3</sup> Laboratory of Cutaneous Aging Research, Biomedical Research Institute, Seoul National University Hospital, Seoul 03080, Republic of Korea

<sup>4</sup> Institute of Human-Environment Interface Biology, Seoul National University, Seoul 03080, Republic of Korea

<sup>5</sup> Institute on Aging, Seoul National University, Seoul 03080, Republic of Korea

\* Correspondence: stlee@yonsei.ac.kr; Tel.: +82-2-2123-2703

**Table S1.** Primer sequences used for RT-PCR of human *LRG1* and selected DEG mRNAs.

| Gene symbol     | Nucleotide sequence                                             | Nucleotide position    | Annealing temp. (°C) | GenBank # |
|-----------------|-----------------------------------------------------------------|------------------------|----------------------|-----------|
| <i>LRG1</i>     | 5'-CTAGGGCAGCCAAACTGGGACA -3'<br>5'-CTGAAGCCAACGATAGAGGTCGCT-3' | 870-891<br>968-945     | 58.5                 | NM_052972 |
| <i>ELN</i>      | 5'-ACCTGGTTGACCTGTCATGGC-3'<br>5'-ACTGCTCTGAAGTTCAGTGGACC-3'    | 2916-2936<br>3094-3072 | 63                   | NM_000501 |
| <i>COMP</i>     | 5'-ACGTGGTCTTGGACACAACCAT-3'<br>5'-AGCTGATGGGTCTCATAGTCCTCT-3'  | 2165-2186<br>2297-2275 | 63                   | NM_000095 |
| <i>LRRC15</i>   | 5'-TCAACATCAGCTCAGCTGGCAG-3'<br>5'-TGA CTGTGACTCGAGGAGGAG-3'    | 3365-3385<br>3539-3519 | 66                   | NM_130830 |
| <i>SERPINE1</i> | 5'-CAGACCTGGTTCCCACTGAGG-3'<br>5'-GCCAGTGCCACAGTGGACT-3'        | 1679-1699<br>1880-1862 | 66                   | NM_000602 |
| <i>OLFM2</i>    | 5'-AGTATTCCCACATCTCGATGCTGG-3'<br>5'-GATCACCTTGAGGGACACAGG-3'   | 1387-1410<br>1601-1580 | 66                   | NM_058164 |
| <i>SEMA7A</i>   | 5'-TGAGGCCTGAGTCCTTCTGGA-3'<br>5'-ACATGCAAGGCGGCTGTCCT-3'       | 2423-2443<br>2582-2573 | 66                   | NM_003612 |
| <i>COL7A1</i>   | 5'-TGGTACCATCGGGCTGTGACA-3'<br>5'-AGGGGATGCTGAATCTCAGCTCA-3'    | 8737-8757<br>8932-8910 | 63                   | NM_000094 |
| <i>CCN2</i>     | 5'-CCCCAGTGACAGCTAGGATGT-3'<br>5'-TGCCACAAGCTGTCCAGTCT-3'       | 1643-1663<br>1798-1779 | 63                   | NM_001901 |
| <i>IL11</i>     | 5'-CTGCACCTGACACTTGACTGG-3'<br>5'-CGGAAGGACTGTCTCTAACTAGG -3'   | 694-714<br>883-861     | 63                   | NM_000641 |
| <i>FIBIN</i>    | 5'-TGCTTTGCATGCCTGCCAACC-3'<br>5'-CAGTGTGACTGTGCAACCACTAC-3'    | 1527-1547<br>1751-1729 | 66                   | NM_203371 |
| <i>LTBP2</i>    | 5'-TGTGGTCTTGTTTCTGAGAGGCC-3'<br>5'-GGTTGGAGTGAGTCTCTGCTTGT-3'  | 6704-6726<br>6834-6812 | 63                   | NM_000428 |
| <i>CRLF1</i>    | 5'-TCAGCTTCCGCCTCTACGAC-3'<br>5'-TCTGCGTCTCCACGTGGCA-3'         | 1291-1310<br>1457-1439 | 63                   | NM_004750 |
| <i>CCN3</i>     | 5'-CAGCTCTGAACTTCCAAGCTCC-3'<br>5'-GGCTATGAGGGACCAGTCATCT-3'    | 1641-1662<br>1885-1864 | 63                   | NM_002514 |

**Table S2.** Read count datasets of RNA-seq for selected 13 DEGs and *COL1A1*, *MMP1*, and *GAPDH* genes.

| Gene symbol     | Negative control | LRG1    | log <sub>2</sub> (Fold Change) | <i>p</i> value        | <i>q</i> value        |
|-----------------|------------------|---------|--------------------------------|-----------------------|-----------------------|
| <i>COL1A1</i>   | 178,141          | 336,523 | 1.03                           | $1.4 \times 10^{-5}$  | $2.0 \times 10^{-3}$  |
| <i>ELN</i>      | 1,503            | 12,978  | 3.23                           | $6.1 \times 10^{-36}$ | $1.4 \times 10^{-31}$ |
| <i>COMP</i>     | 406              | 2,087   | 2.48                           | $9.5 \times 10^{-22}$ | $3.6 \times 10^{-18}$ |
| <i>LRRC15</i>   | 332              | 1,638   | 2.42                           | $1.6 \times 10^{-20}$ | $4.4 \times 10^{-17}$ |
| <i>SERPINE1</i> | 6,727            | 27,125  | 2.13                           | $4.9 \times 10^{-18}$ | $9.4 \times 10^{-15}$ |
| <i>OLFM2</i>    | 216              | 859     | 2.11                           | $2.3 \times 10^{-15}$ | $3.2 \times 10^{-12}$ |
| <i>SEMA7A</i>   | 794              | 2,653   | 1.86                           | $9.8 \times 10^{-14}$ | $1.1 \times 10^{-10}$ |
| <i>COL7A1</i>   | 5,123            | 16,447  | 1.8                            | $1.5 \times 10^{-13}$ | $1.6 \times 10^{-10}$ |
| <i>CCN2</i>     | 1,230            | 3,672   | 1.7                            | $5.2 \times 10^{-12}$ | $4.4 \times 10^{-9}$  |
| <i>IL11</i>     | 162              | 467     | 1.64                           | $1.7 \times 10^{-9}$  | $8.2 \times 10^{-7}$  |
| <i>FIBIN</i>    | 159              | 432     | 1.56                           | $1.2 \times 10^{-8}$  | $4.6 \times 10^{-6}$  |
| <i>LTBP2</i>    | 12,858           | 34,045  | 1.52                           | $2.8 \times 10^{-10}$ | $1.7 \times 10^{-7}$  |
| <i>CRLF1</i>    | 1,008            | 2,622   | 1.5                            | $1.1 \times 10^{-9}$  | $5.8 \times 10^{-7}$  |
| <i>MMP1</i>     | 77,803           | 37,783  | -0.92                          | $1.0 \times 10^{-4}$  | $1.1 \times 10^{-2}$  |
| <i>CCN3</i>     | 4,136            | 1,139   | -1.74                          | $1.4 \times 10^{-12}$ | $1.3 \times 10^{-9}$  |
| <i>GAPDH</i>    | 83,285           | 68,474  | -0.17                          | $4.8 \times 10^{-1}$  | 1.0                   |

**Table S3.** Read count datasets of RNA-seq for *TGFB* family members.

| Gene symbol  | Negative control | LRG1  | log <sub>2</sub> (Fold Change) | <i>p</i> value       | <i>q</i> value        |
|--------------|------------------|-------|--------------------------------|----------------------|-----------------------|
| <i>TGFB1</i> | 2,732            | 5,007 | 0.99                           | $3.7 \times 10^{-5}$ | $4.8 \times 10^{-36}$ |
| <i>TGFB2</i> | 200              | 208   | 0.17                           | $5.4 \times 10^{-1}$ | 1.0                   |
| <i>TGFB3</i> | 105              | 71    | -0.45                          | $1.8 \times 10^{-1}$ | 1.0                   |

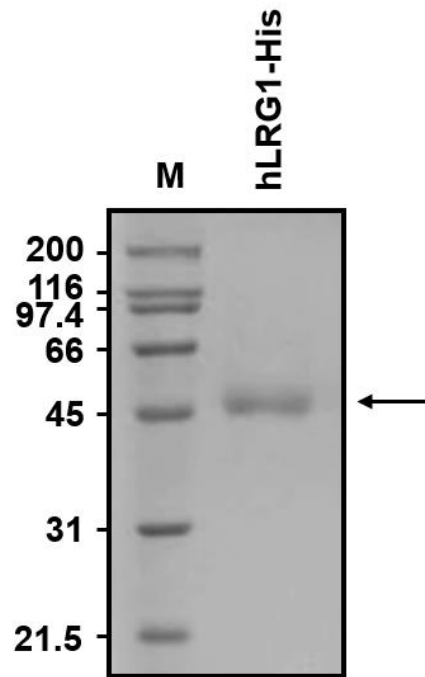

**Figure S1. Purification of recombinant human LRG1-His.**

The recombinant human LRG1-His polypeptide was purified from the conditioned medium of HEK 293 cells stably transfected with pcDNA3.1-hLRG1-His. The purified hLRG1-His polypeptide was resolved by SDS-PAGE and stained with Coomassie Brilliant Blue. The molecular weight marker (M) is shown on the left margin of the gel.

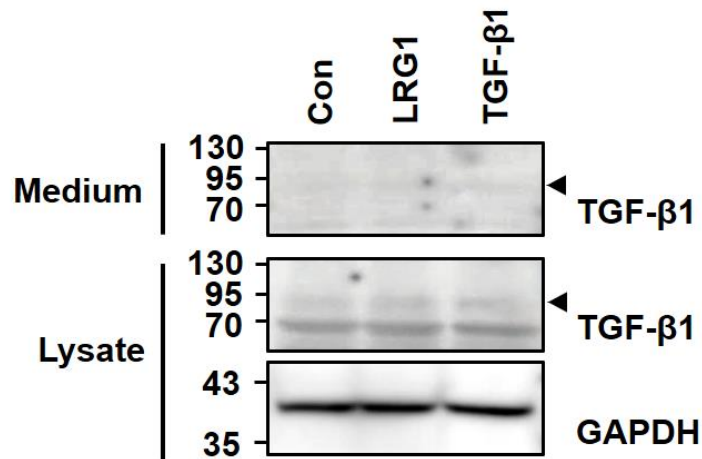

**Figure S2. Analysis of TGF-β1 levels expressed in fibroblasts treated with LRG1.**

Human foreskin fibroblasts were incubated in serum-free DMEM containing 2 µg/mL LRG1 or 3 ng/mL TGF-β1 for 24 h. TGF-β1 levels in conditioned media and cell lysates were analyzed in non-reduced SDS-PAGE and western blotting with an antibody against TGF-β1. GAPDH was used as loading control. The molecular weight marker is shown on the left margin of the blot. Arrowheads indicate positions for the dimer of TGF-β1 precursor.
